# Supplementary material
Source: PubMed Central journal article supplement (PMC6457199)
Supplement: MD-010-C9MD00061E-s001.pdf [file MD-010-C9MD00061E-s001.pdf]

## Cyclic analogue of tambjamine YP1 alkaloid isolated from marine bacterium *Pseudoalteromonas citrea*

Katherine J. Picott<sup>a</sup>, Julie A. Deichert<sup>a</sup>, Ella M. Dekemp<sup>a</sup>, Gabriele Schatte<sup>a</sup>, Françoise Sauriol<sup>a</sup>, and Avena C. Ross<sup>\*a</sup>

<sup>a</sup>Department of Chemistry, Queen's University, Kingston, ON, Canada.

\*Corresponding author: Avena C. Ross, [avena.ross@queensu.ca](mailto:avena.ross@queensu.ca)

### Supplementary Information

Table S1. Proteins in the *tam* pathway, their putative functions, and the percent identity between *P. tunicata* and *P. citrea* proteins<sup>1-4</sup>.

| Protein | Putative function                          | Identity (%) |
|---------|--------------------------------------------|--------------|
| TamA    | Adenylation and acyl-carrier protein       | 70           |
| TamB    | Peptidyl-carrier protein                   | 69           |
| TamC    | Rieske oxygenase                           | 83           |
| TamD    | Aminotransferase                           | 78           |
| TamE    | L-prolyl-AMP ligase                        | 56           |
| TamF    | $\beta$ -ketoacyl synthase                 | 49           |
| TamG    | L-prolyl-PCP dehydrogenase                 | 74           |
| TamH    | Thioester reductase and aminotransferase   | 71           |
| TamJ    | Oxidase/dehydrogenase                      | 53           |
| TamK    | Outer membrane lipoprotein sorting protein | 74           |
| TamL    | Permease                                   | 75           |
| TamM    | Permease                                   | 75           |
| TamN    | ATP-transporter, ATP-binding protein       | 78           |
| TamO    | Hypothetical protein                       | 56           |
| TamP    | SAM dependent <i>O</i> -methyl transferase | 69           |
| TamQ    | Condensation enzyme                        | 65           |
| TamR    | No assigned function                       | 66           |
| TamS    | Phosphopantetheinyl transferase            | 42           |
| TamT    | Dehydrogenase                              | 62           |

## Tambjamine MYP1 structural data

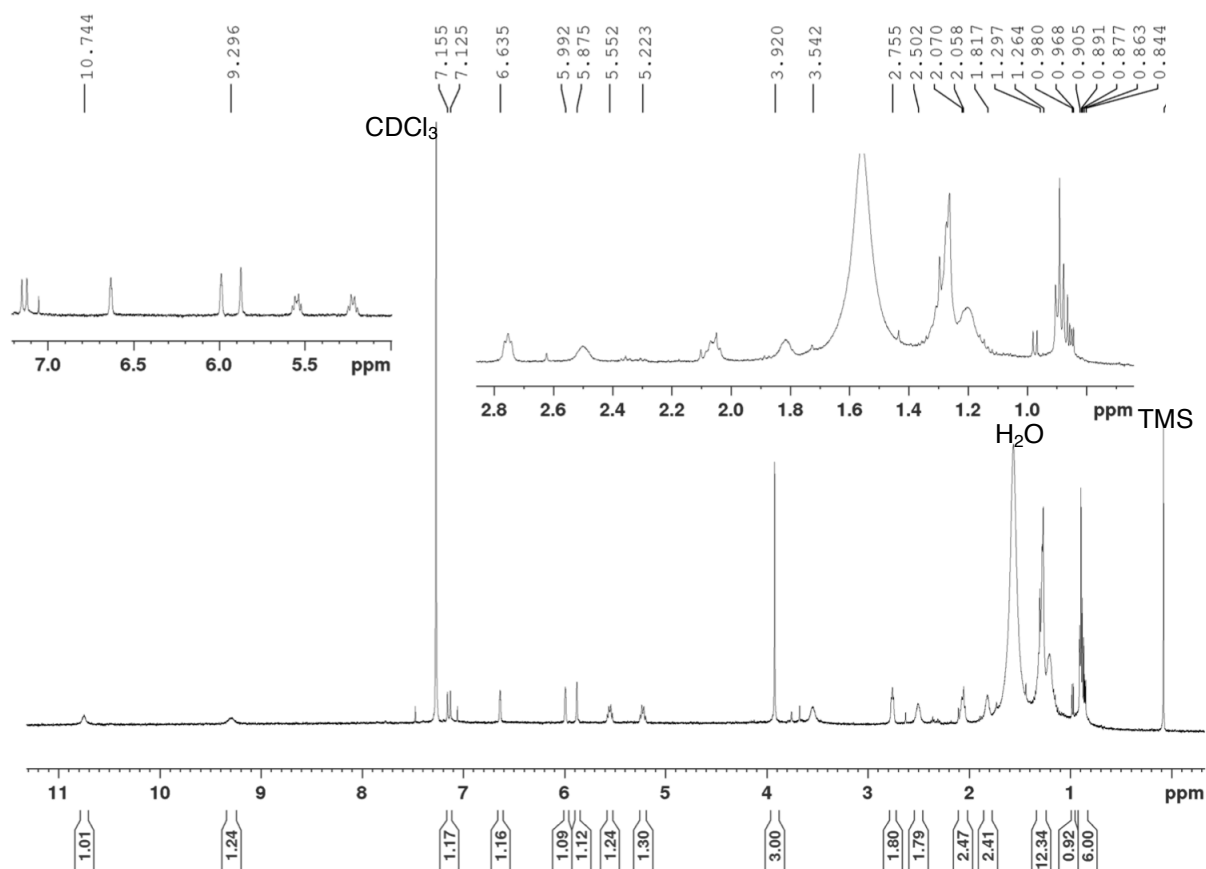

Figure S1. <sup>1</sup>H NMR spectrum of tambjamine MYP1 collected in CDCl<sub>3</sub> in a 500 MHz field. Solvents and internal standard trimethylsilane (TMS) are labelled.

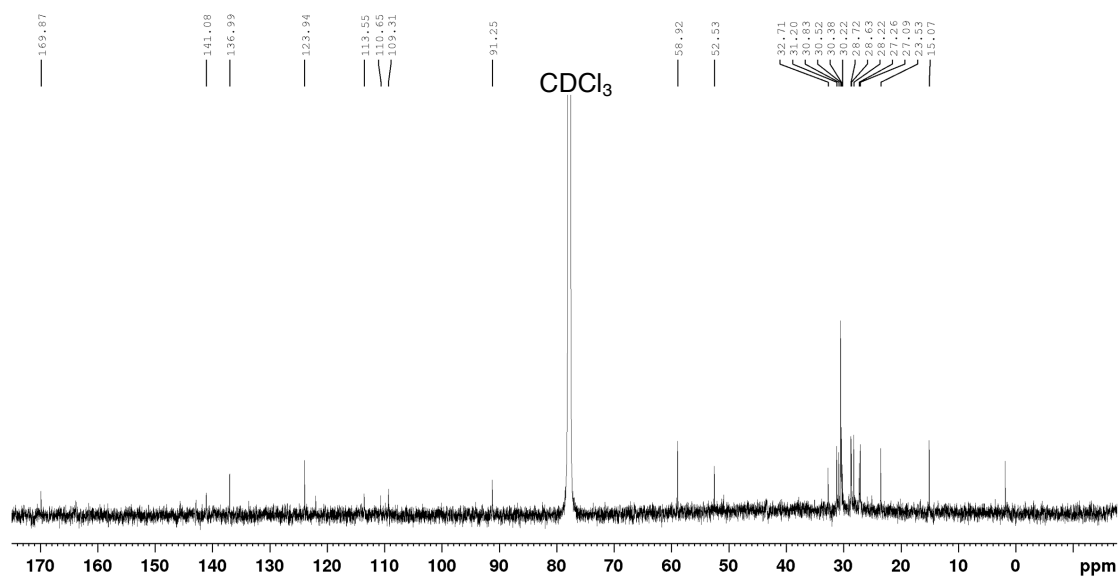

Figure S2. <sup>13</sup>C NMR spectrum of tambjamine MYP1 collected in CDCl<sub>3</sub> in a 700 MHz field.

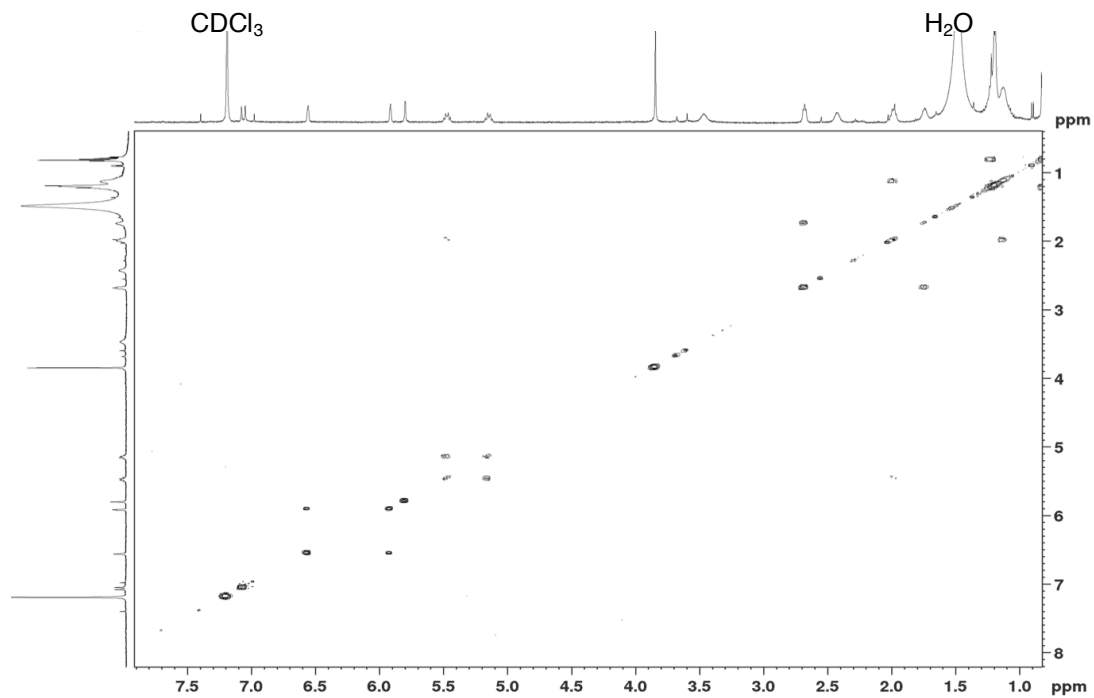

Figure S3.  $^1\text{H}$ - $^1\text{H}$  COSY NMR spectrum of tambjamine MYP1. Collected in  $\text{CDCl}_3$  in a 500 MHz field.

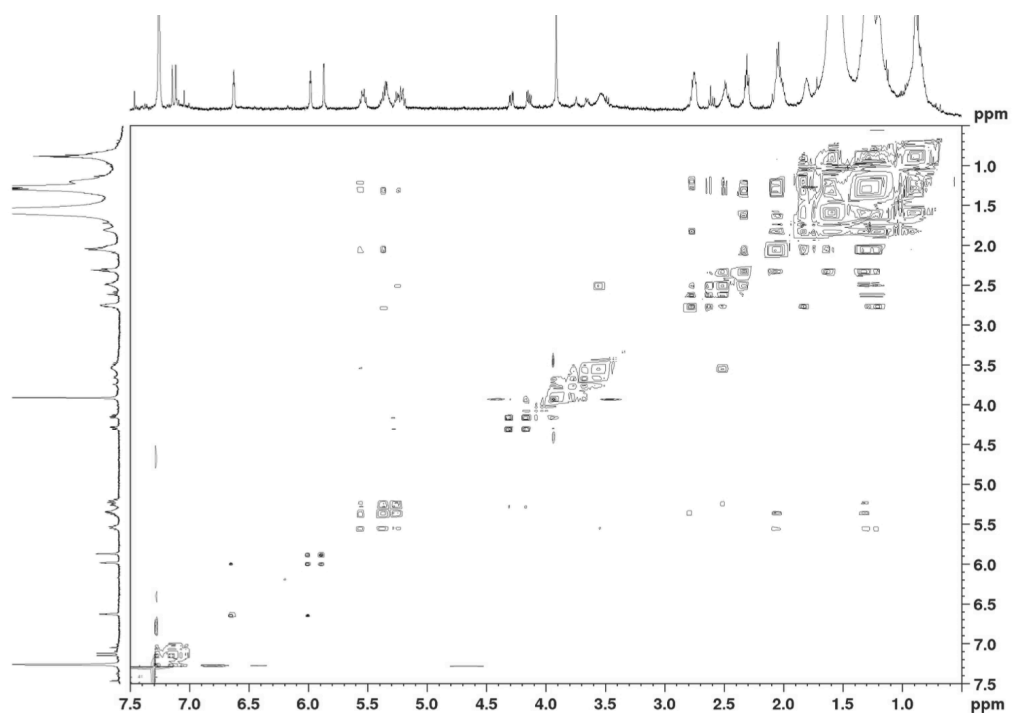

Figure S4.  $^1\text{H}$ - $^1\text{H}$  TOCSY NMR spectrum of tambjamine MYP1 with unknown impurity, collected in  $\text{CDCl}_3$  in a 500 MHz field.

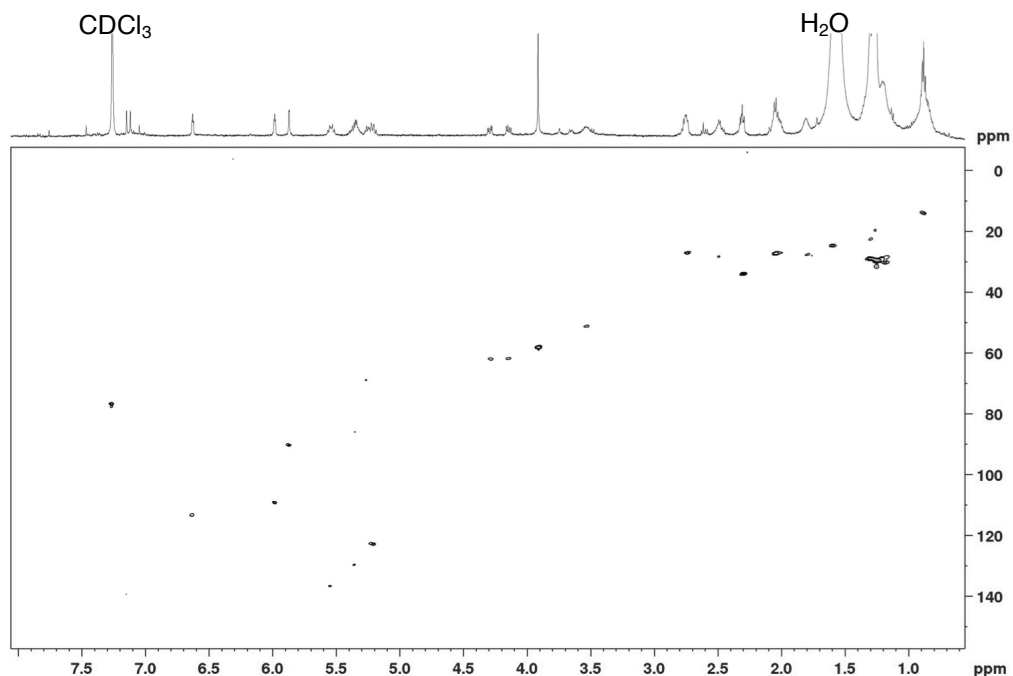

Figure S5.  $^1\text{H}$ - $^{13}\text{C}$  HSQC NMR spectrum of tambjamine MYP1 with unknown impurity, collected in  $\text{CDCl}_3$  in a 500 MHz field.

Table S2. Crystal data and structure refinement for tambjamine MYP1<sup>5,6</sup>.

| Crystal Data                      |                                                  |
|-----------------------------------|--------------------------------------------------|
| Empirical formula                 | $\text{C}_{24}\text{H}_{35}\text{N}_3\text{O}_5$ |
| Formula weight                    | 445.55                                           |
| Crystal Color, Habit              | yellow, plate-like                               |
| Crystal dimensions (mm)           | $0.186 \times 0.128 \times 0.090$                |
| Crystal system                    | triclinic                                        |
| Space group                       | $P\bar{1}$ [2]                                   |
| Unit cell parameters              |                                                  |
| $a$ (Å)                           | 9.8155(5)                                        |
| $b$ (Å)                           | 11.1719(5)                                       |
| $c$ (Å)                           | 11.1821(5)                                       |
| $\alpha$ (°)                      | 91.5571(16)                                      |
| $\beta$ (°)                       | 95.2218(16)                                      |
| $\gamma$ (°)                      | 101.2158(17)                                     |
| $V$ (Å <sup>3</sup> )             | 1196.53(10)                                      |
| $Z^b$                             | 2                                                |
| $F(000)$                          | 480                                              |
| Density ( $\rho_{\text{calcd}}$ ) | $1.237 \text{ Mg/m}^3$                           |
| Absorption coefficient ( $\mu$ )  | $0.087 \text{ mm}^{-1}$                          |

#### Data Collection and Refinement Conditions

|                                                                                  |                                                                                    |
|----------------------------------------------------------------------------------|------------------------------------------------------------------------------------|
| Diffractometer                                                                   | Bruker AXS D8 Venture Duo diffractometer                                           |
| Radiation                                                                        | monochromated Mo K $\alpha$ ( $\lambda = 0.71073 \text{ \AA}$ )                    |
| Temperature                                                                      | -93(2) °C [180(2) K]                                                               |
| Scan type                                                                        | $\varphi$ - and $\omega$ -scans (1.5 $^\circ$ /frame, 15 s exposure/frame, 9 sets) |
| Theta range for data collection                                                  | 2.533 to 26.396 $^\circ$                                                           |
| Completeness to theta = 25.242 $^\circ$                                          | 99.9%                                                                              |
| Reflections collected                                                            | 38405                                                                              |
| Index ranges                                                                     | $-12 \leq h \leq 12$ , $-13 \leq k \leq 13$ , $-13 \leq l \leq 13$                 |
| Independent reflections [ $F_o^2 \geq -3\sigma(F_o^2)$ ]                         | 4891 [ $R_{\text{int}} = 0.0736$ ]                                                 |
| Observed reflections [ $F_o^2 > 2\sigma(F_o^2)$ ]                                | 3437                                                                               |
| Absorption correction method                                                     | multi-scan [SADABS]                                                                |
| Anomalous Dispersion                                                             | For all non-hydrogen atoms                                                         |
| Structure solution method                                                        | Direct methods (SHELXT-2014)                                                       |
| Refinement method                                                                | Full-matrix least-squares on $F^2$<br>(SHELXL-2017/1) <sup>i</sup>                 |
| Function Minimized                                                               | $\Sigma w( F_o ^2 -  kF_c ^2)^2$ ( $k$ : overall scale factor)                     |
| Weighing scheme, $w$                                                             | $w = [\sigma(F_o^2) + (0.0723 P)^2 + 1.2456 P]^{-1}$                               |
| $w = [\sigma(F_o^2) + (a P)^2 + (b P)]^{-1}$                                     |                                                                                    |
| $P$ -factor                                                                      | $[\text{Max}(F_o^2, 0) + 2 F_c^2]/3$                                               |
| Data / restraints / parameters                                                   | 4891 [ $F_o^2 \geq -3\sigma(F_o^2)$ ] / 5 / 305                                    |
| Reflection (observed)/parameter ratio                                            | 11:1                                                                               |
| Reflection (data)/parameter ratio                                                | 16:1                                                                               |
| Goodness-of-fit on $F^2$                                                         | 1.018                                                                              |
| $GoodF = \{\Sigma[w(F_o^2 - F_c^2)^2]/(n - p)\}^{1/2}$                           |                                                                                    |
| $n$ : number of reflections, $p$ : number of parameters                          |                                                                                    |
| Final $R$ indices                                                                |                                                                                    |
| $R_1 = [\Sigma   F_o  -  F_c  ]/[\Sigma  F_o ]$ for [ $F_o^2 > 2\sigma(F_o^2)$ ] | 0.0641                                                                             |
| $wR_2 = \{[\Sigma w(F_o^2 - F_c^2)^2]/[\Sigma w(F_o^2)^2]\}^{1/2}$ [all data]    | 0.1795                                                                             |
| Max. Shift/Error in Final Cycle                                                  | 0.000                                                                              |
| Largest difference peak and hole                                                 | 0.833 and -0.603 e $^-/\text{\AA}^3$                                               |
| Transmission factor (min)                                                        | 0.7071 [SADABS]                                                                    |
| Transmission factor (max)                                                        | 0.7454 [SADABS]                                                                    |

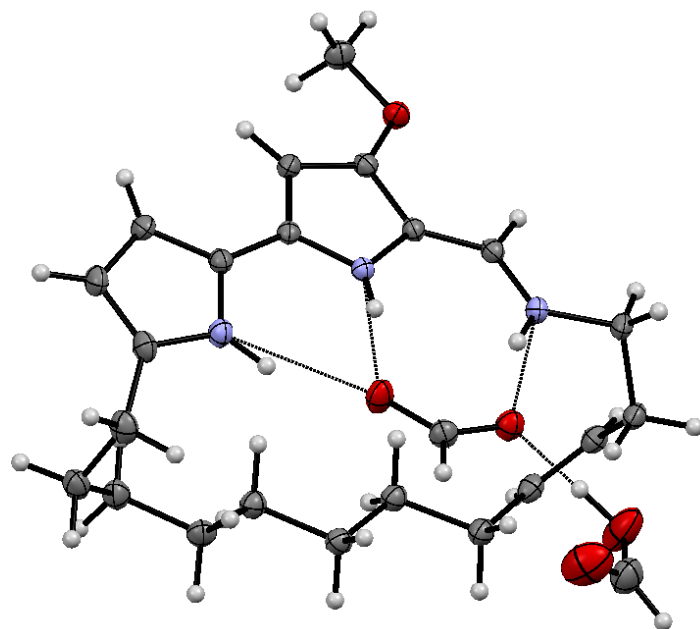

Figure S6. Full asymmetric unit of tambjamine MYP1 crystal structure, thermal ellipsoids are drawn to 30% probability.

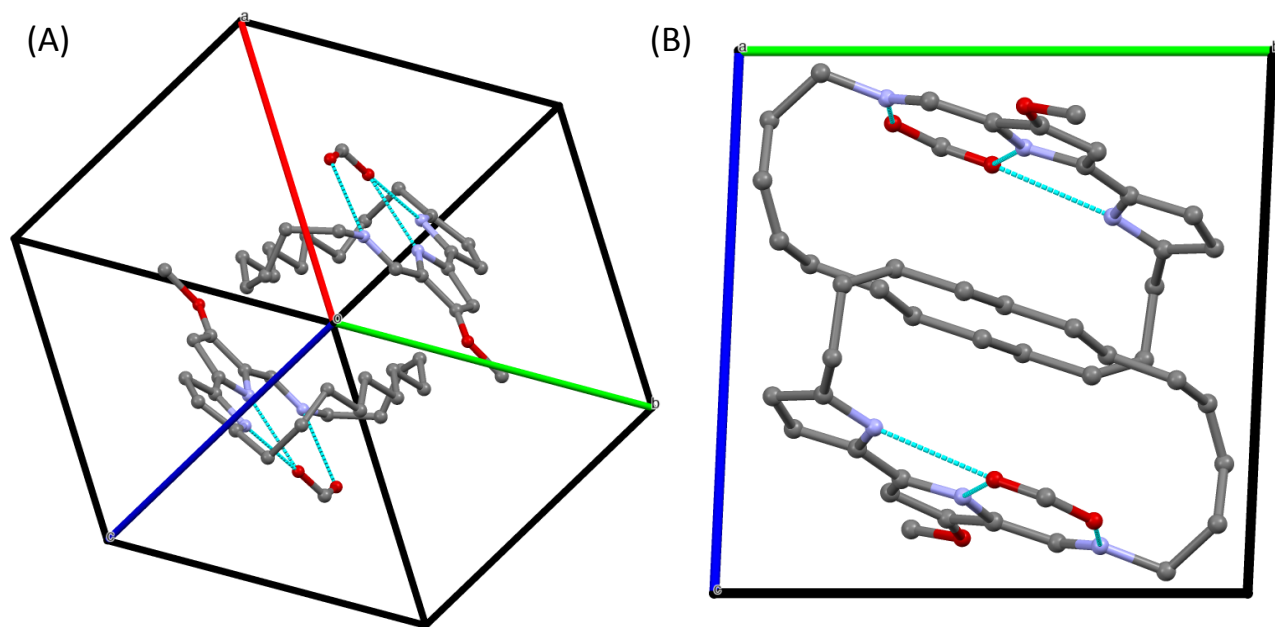

Figure S7. Unit cell of tambjamine MYP1 X-ray structure. (A) View at origin of unit cell, (B) view on  $ab$  face of unit cell. Hydrogen atoms and formic acid molecule omitted for clarity. The edge colours refer to the  $a$  (blue),  $b$  (green), and  $c$  (red) coordinates.

## General synthesis information

Commercially available reagents were used throughout without further purification. Reactions were carried out under an argon atmosphere using oven-dried glassware.  $^1\text{H}$  NMR spectra were recorded using a Bruker Avance-400 spectrometer operating at 400 MHz. Anhydrous DCE (Sure/Seal™) was obtained from Sigma-Aldrich and used as received.

## Synthesis of Tambjamine BE-18591·HCl

### (Z)-N-((4'-methoxy-1H,5'H-[2,2'-bipyrrol]-5'-ylidene)methyl)dodecan-1-amine hydrochloride

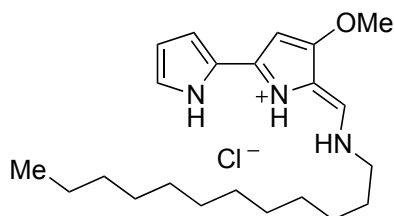

Tambjamine BE-18591 was synthesized by modification of the method of Saggiomo *et al*<sup>7</sup>. To a solution of 4-methoxy-2,2'-bipyrrole-5-carboxaldehyde (10 mg, 0.053 mmol) and dodecylamine (13 mg, 0.068 mmol) in DCE (1 mL) was added 2 drops AcOH (cat.). The reaction mixture was heated at 60 °C for 3 h, then cooled to rt, diluted with  $\text{CH}_2\text{Cl}_2$  (5 mL), and washed with 1 M HCl (3 × 10 mL). The organic fraction was dried over  $\text{MgSO}_4$ , subjected to filtration, and concentrated *in vacuo* to deliver the title compound as a yellow oil (18 mg, 89%).

$^1\text{H}$  NMR (400 MHz;  $\text{CDCl}_3$ ):  $\delta$  13.70 (br s, 1H), 10.62 (br s, 1H), 9.52-9.40 (m, 1H), 7.33 (d,  $J = 14.9$  Hz, 1H), 7.06 (dd,  $J = 1.4$  and 2.7 Hz, 1H), 6.73 (dd,  $J = 1.4$  and 3.7 Hz, 1H), 6.28 (2.6 and 3.8 Hz), 5.94 (d,  $J = 2.2$  Hz, 1H), 3.92 (s, 3H), 3.51-3.45 (m, 2H), 1.75 (p,  $J = 7.3$  Hz, 2H), 1.34-1.25 (m, 18H), 0.87 (t,  $J = 6.7$  Hz, 3H).

Physical and spectral data were found to be consistent with those reported<sup>7</sup>.

## pK<sub>a</sub> determination information

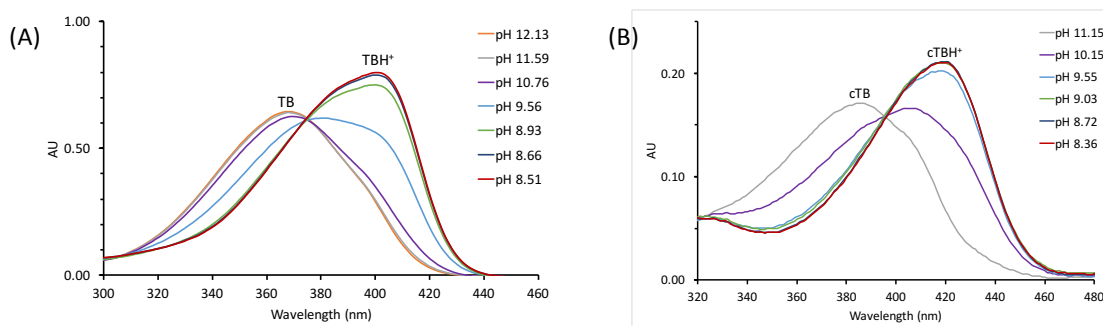

Figure S8. Absorbance spectra at varying pH of (A) the linear tambjamine BE-19591 (TB = base form, TBH<sup>+</sup> = acid form) and (B) the tambjamine MYP1 (cTB = base form, cTBH<sup>+</sup> = acid form). Spectra taken in 0.1 M NaCl in 1:1 (v/v) MeCN/H<sub>2</sub>O, pH adjusted with 0.1-0.01 M HCl.

Table S3. The absorbance maxima of each compound in their basic and acidic forms, and the calculated pK<sub>a</sub>.

| Compound            | Base λ <sub>max</sub> (nm) | Acid λ <sub>max</sub> (nm) | pK <sub>a</sub> |
|---------------------|----------------------------|----------------------------|-----------------|
| Tambjamine BE-18591 | 368                        | 400                        | 9.9 ± 0.2       |
| Tambjamine MYP1     | 385                        | 420                        | 10.4 ± 0.3      |

The pK<sub>a</sub> was calculated using Equation S1 from previous literature<sup>8</sup>, this was done with absorbance measurements at several pH values using both λ<sub>max</sub> (basic and acidic) for calculations, these were then averaged. In the equation, A refers to the experimental absorbance at a particular wavelength, A<sub>b</sub><sup>-</sup> is the absorbance of the base form at this wavelength, and AH is the absorbance of the acidic form.

Equation S1

$$pK_a = pH + \log \left( \frac{A - A_b^-}{A_H - A} \right)$$

## References:

- 1 C. Burke, T. Thomas, S. Egan and S. Kjelleberg, *Environ. Microbiol.*, 2007, **9**, 814–818.
- 2 A. M. Cerdeño, M. J. Bibb and G. L. Challis, *Chem. Biol.*, 2001, **8**, 817–829.
- 3 S. F. Altschul, W. Gish, W. Miller, E. W. Myers and D. J. Lipman, *J. Mol. Biol.*, 1990, **215**, 403–410.
- 4 D. M. Withall, S. W. Haynes and G. L. Challis, *J. Am. Chem. Soc.*, 2015, **137**, 7889–7897.
- 5 G. M. Sheldrick, *Acta Crystallogr.*, 2008, **A64**, 112–122.
- 6 G. M. Sheldrick, *Acta Crystallogr.*, 2015, **A71**, 3–8.
- 7 V. Saggiomo, S. Otto, I. Marques, V. Felix, T. Torroba and R. Quesada, *Chem. Commun.*, 2012, **48**, 5274–5276.
- 8 G. S. Patterson, *J. Chem. Educ.*, 1999, **76**, 395–398.
